# Supplementary material for: AXL Inhibition Extinguishes Primitive JAK2 Mutated Myeloproliferative Neoplasm Progenitor Cells
Source: PubMed Central journal article supplement (PMC6746025; doi:10.1097/hs9.0000000000000233), 2019-04-24
Supplement: hs9-3-e233-s001.pdf [file hs9-3-e233-s001.pdf]

## Supplementary Data

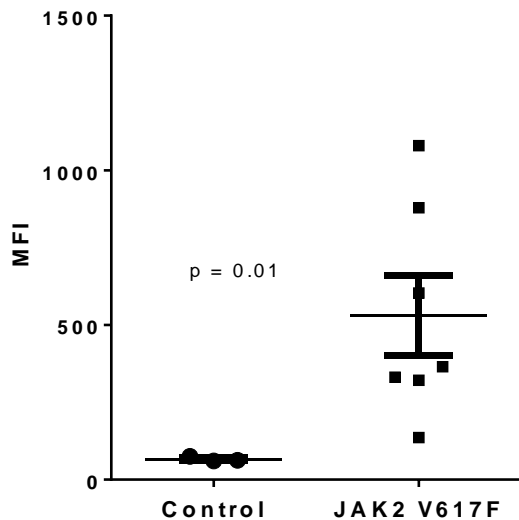

**Supplementary Figure 1: Phospho Y779 AXL expression.** CD34<sup>+</sup> cells isolated from normal (n=3) and JAK2 V617F patients (n=7) were stained with anti Y779 phosphoAXL (R&D systems #IC6965P) and expression levels analysed on a LSR Fortessa flow cytometer (BD Biosciences) using FloJo software. Results are displayed as median fluorescent intensity (MFI) +/- SEM and the results of a statistical t-test are shown.

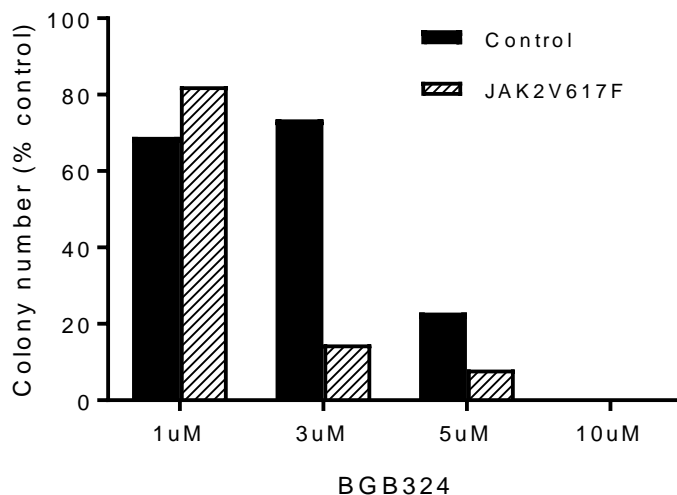

**Supplementary Figure 2: Primary cell colony forming assays in the presence of different doses of BGB324.** Colony forming assays were performed in the presence of a range of BGB324 doses by plating CD34<sup>+</sup> cells in methylcellulose complete media (R&D systems) supplemented with 2u/ml EPO at a density of 3000cells/ml. 0.2ml was dispensed into each of 4 wells of a 24 well plate. Plates were incubated at 37°C in 5% CO<sub>2</sub> for 14 days before the number of colonies were counted. Data shown for n=1 for control and JAK2V617F PV patient samples

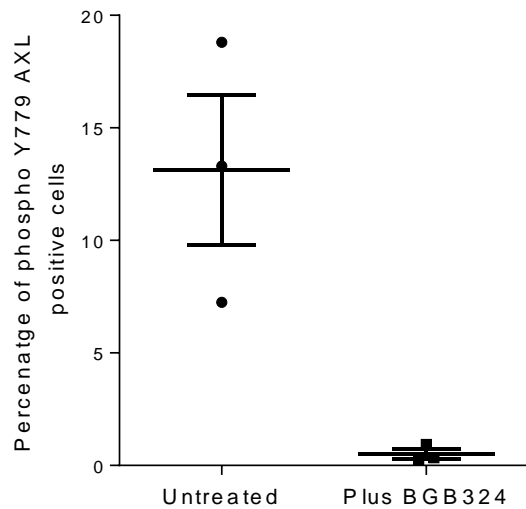

**Supplementary Figure 3: Inhibition of phospho Y779 AXL expression by BGB324.** CD34+ cells isolated from JAK2 V617F patients were treated with 3 $\mu$ M BGB324 for 4 hours prior to staining with anti Y779 phosphoAXL (R&D systems #IC6965P) and expression levels analysed on a Novocyte flow cytometer (ACEA Biosciences) using FloJo software. Results are displayed as median fluorescent intensity (MFI) +/- SEM n=3.

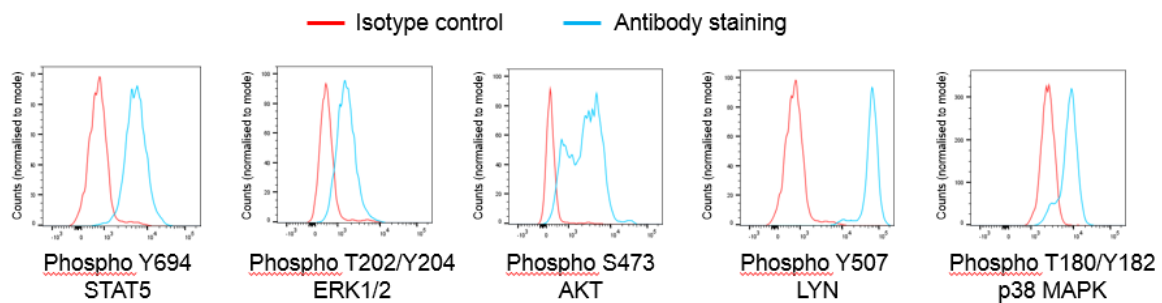

**Supplementary Figure 4: Phospho protein detection assay development.** JAK2 V617F expressing SET-2 cells were stained with antibodies against Y694 phospho-STAT5, T202/Y204 phospho-ERK1/2, S473 phospho-AKT, Y507 phospho-LYN and T180/Y182 phospho-p38MAPK and expression levels analysed on a Novocyte flow cytometer (ACEA Biosciences) using FloJo software. Representative FACS plots are shown.

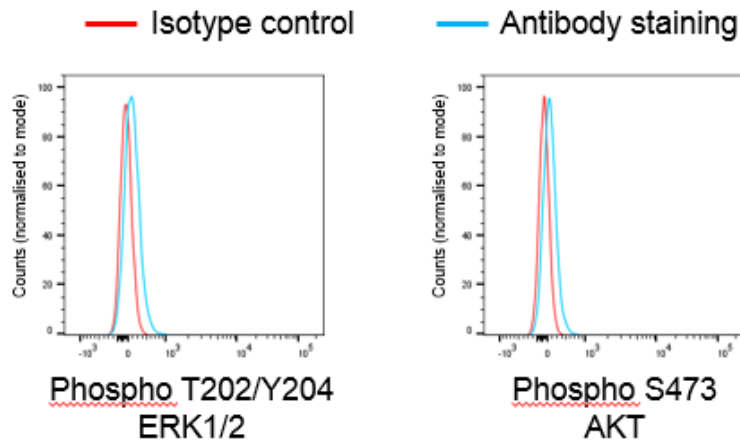

**Supplementary Figure 5: Phospho-ERK and phospho-AKT are not detected in CD34+ cells from patients with MPN.** CD34+ cells isolated from JAK2 V617F patients were cultured in Fischers medium supplemented with 5% horse serum for 4 hours and then stained with anti T202/Y204 phospho-ERK1/2 and anti S473 phospho-AKT antibody and expression levels analysed on a Novocyte flow cytometer (ACEA Biosciences) using FloJo software. A representative FACS plot from one patient of five examined is shown.

**Supplementary Table 1. Colony forming assay data used in Figure 4a**

| Patient treatment prior to experimentation <i>in vitro</i>                   | Ruxolitinib                       |     |     | Pacritinib | Venesection alone | Transfusion support | Interferon | hydroxycarbamide |     |
|------------------------------------------------------------------------------|-----------------------------------|-----|-----|------------|-------------------|---------------------|------------|------------------|-----|
|                                                                              | Colony number in untreated sample | 47  | 138 | 11         | 32                | 25                  | 65         | 131              | 11  |
| Colony number in ruxolitinib treated samples as a percentage of DMSO control | 68%                               | 79% | 85% | 62%        | 49%               | 84%                 | 84%        | 82%              | 74% |

The data shown are the individual data points used in Figure 4a on the effects of ruxolitinib on colony forming ability of CD34<sup>+</sup> cells enriched from JAK2 V617F patients. Colony forming assays were performed in the absence or presence of BGB324 and ruxolitinib. The data presented here illustrates the response to ruxolitinib in respect to the treatment the patients had received prior to the *in vitro* experiments. Data includes the number of colonies observed in untreated samples and the colonies observed in the doses of ruxolitinib shown as a percentage of the untreated control.

**Supplementary Table 2. Drug dose response data used in Figure 5a**

|                                               | Ruxolitinib concentration | Patient treatment prior to experimentation <i>in vitro</i> |                  |             |
|-----------------------------------------------|---------------------------|------------------------------------------------------------|------------------|-------------|
|                                               |                           | Venesection alone                                          | hydroxycarbamide | Ruxolitinib |
| Colony number in untreated sample             | 0                         | 94                                                         | 104              | 100         |
| Colony number as a percentage of DMSO control | 1nM                       | 97%                                                        | 91%              | 101%        |
|                                               | 5nM                       | 97%                                                        | 95%              | 102%        |
|                                               | 10nM                      | 79%                                                        | 89%              | 87%         |
|                                               | 50nM                      | 70%                                                        | 76%              | 73%         |

The data shown are the individual data points used in Figure 5a on the effects of ruxolitinib on colony forming ability of CD34<sup>+</sup> cells enriched from JAK2 V617F patients. Colony forming assays were performed in the absence or presence of BGB324 and ruxolitinib as a single agent or in combination at various concentrations. The data presented here illustrates the response to ruxolitinib in respect to the treatment the patients had received prior to the *in vitro* experiments. Data includes the number of colonies observed in untreated samples and the colonies observed in the doses of ruxolitinib shown as a percentage of the untreated control.

### Supplementary Table 3: Antibodies used in the study

| Antibody                                  | Company (Catalogue number) | Dilution |
|-------------------------------------------|----------------------------|----------|
| AXL - APC                                 | R&D systems (FAB154A)      | 1/10     |
| CD34 - APC                                | eBioscience (17-0349)      | 1/200    |
| phospho Y779 AXL - PE                     | R&D systems (IC6965P)      | 1/13.3   |
| phospho Y507 LYN                          | Thermo Fisher (720013)     | 1/100    |
| phospho T202/Y204 ERK1/2 - AF488          | BD bioscience (612592)     | 1/10     |
| phospho S473 AKT - PE                     | BD bioscience (560378)     | 1/10     |
| phospho Y694 STAT5 – AF647                | BD bioscience (612599)     | 1/10     |
| phospho T180/Y182 p38 MAPK – pacific blue | BD bioscience (560313)     | 1/10     |

Table detailing the procedures, dilutions and suppliers of the antibodies used in the study

### Supplementary Table 4: RT qPCR reagents

| Gene  | ENSEMBL transcripts                                         | Sequence             |                     | Probe and Cat N°    |
|-------|-------------------------------------------------------------|----------------------|---------------------|---------------------|
|       |                                                             | Forward              | Reverse             |                     |
| AXL   | ENST00000301178.8<br>ENST00000359092.7<br>ENST00000593513.1 | gtggctgtgaagacgatgaa | atgcagaccgcttcactca | #65<br>04688643001  |
| SDHA  | ENST00000264932.10                                          | cctgtcctatgtggacgttg | gtttgtcgcacacgggtct | # 48<br>04688082001 |
| YWHAZ | ENST00000353245.7                                           | gatccccaatgcttcacaag | tgcttggtgactgatcgac | # 30<br>04687639001 |

Table showing primer sequences used to detect AXL, LYN, SDHA and YWHAZ in RT qPCR experiments. All primers were obtained from Life Technologies (Paisley UK). Probes were obtained from Roche (Burgess Hill, UK) and the probe identifiers and catalogue numbers given. The protein isoforms for the mRNAs detected by the assays used are also displayed.
